# Supplementary material for: De novo transcriptome assembly, annotation and comparison of four ecological and evolutionary model salmonid fish species
Source: PubMed Central journal article supplement (PMC5759245; doi:10.1186/s12864-017-4379-x), 2018-01-08
Supplement: 12864_2017_4379_MOESM3_ESM.pdf [file 12864_2017_4379_MOESM3_ESM.pdf]

NCBI Atlantic salmon  
RefSeq Proteins

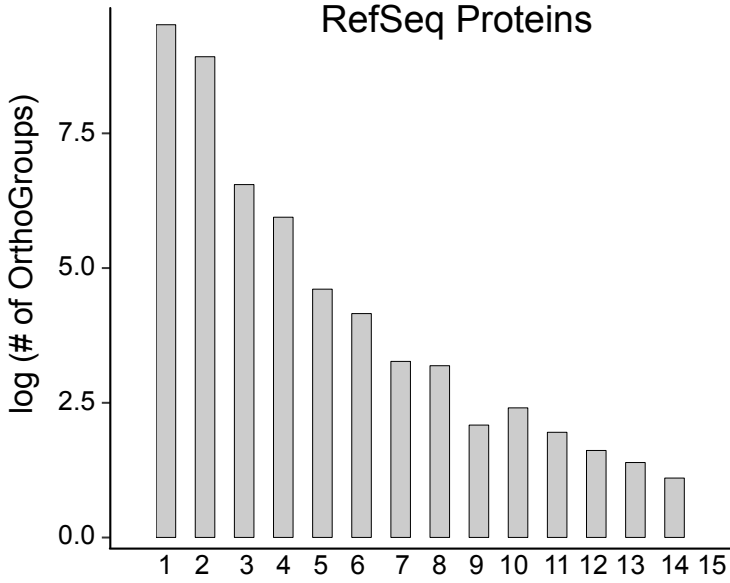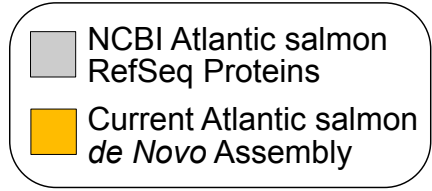

Unfiltered Assembly

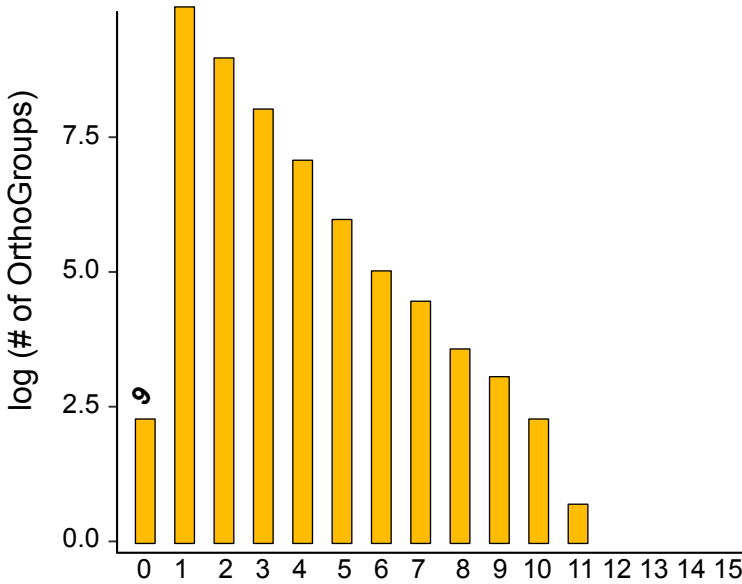

After TransDecoder ORF Prediction

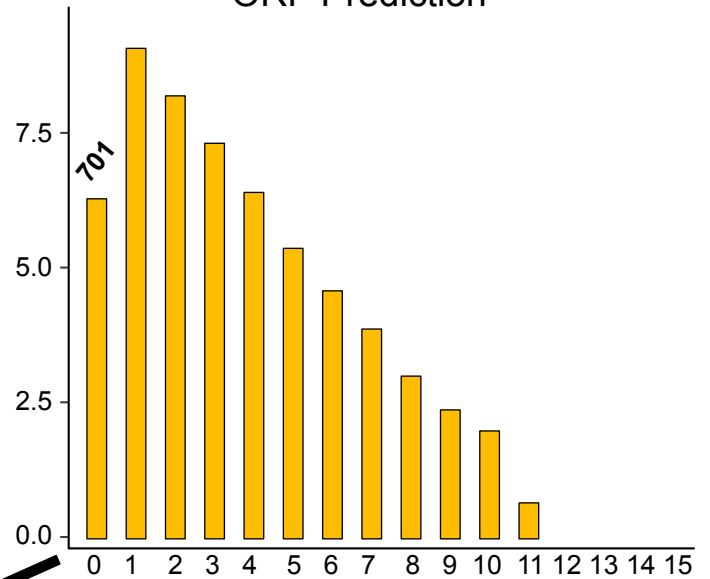

After CD-Hit Clustering

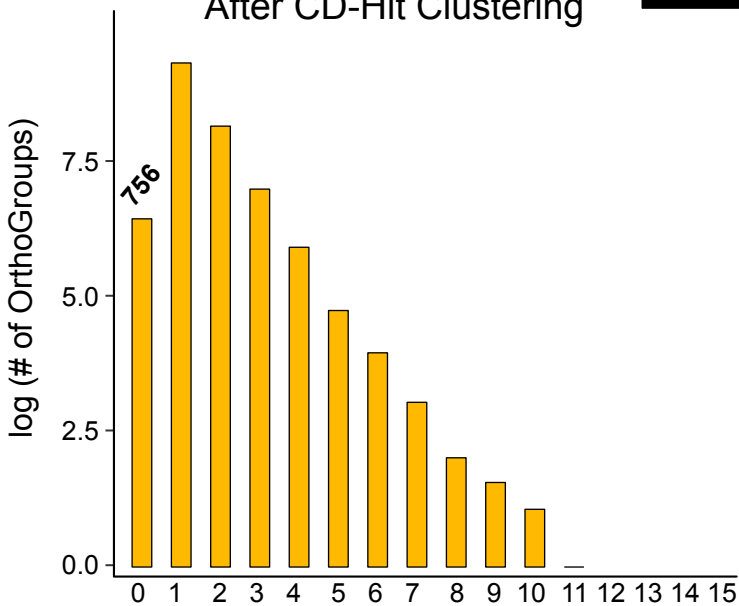

After Trinity Full-Length Transcript Analysis (final assembly)

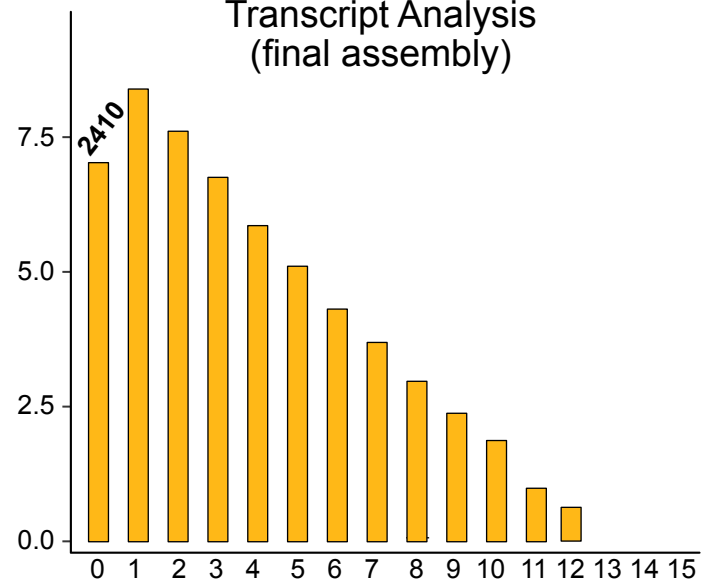

# of Orthologs in OrthoGroup

# of Orthologs in OrthoGroup
