# Supplementary material for: De novo transcriptome assembly, annotation and comparison of four ecological and evolutionary model salmonid fish species
Source: PubMed Central journal article supplement (PMC5759245; doi:10.1186/s12864-017-4379-x), 2018-01-08

### a) Molecular Function

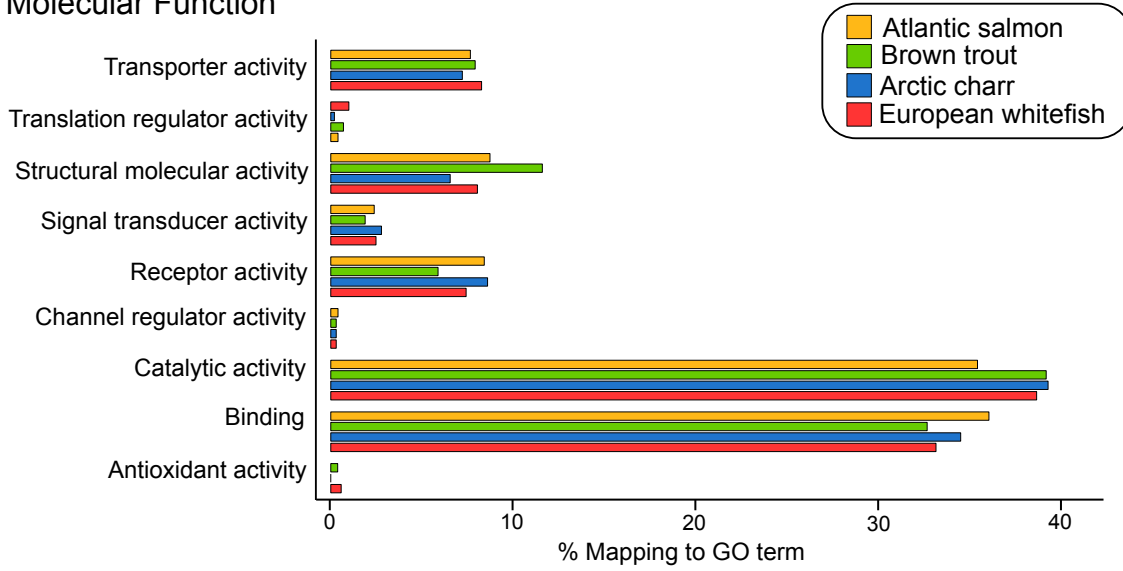

### b) Biological Process

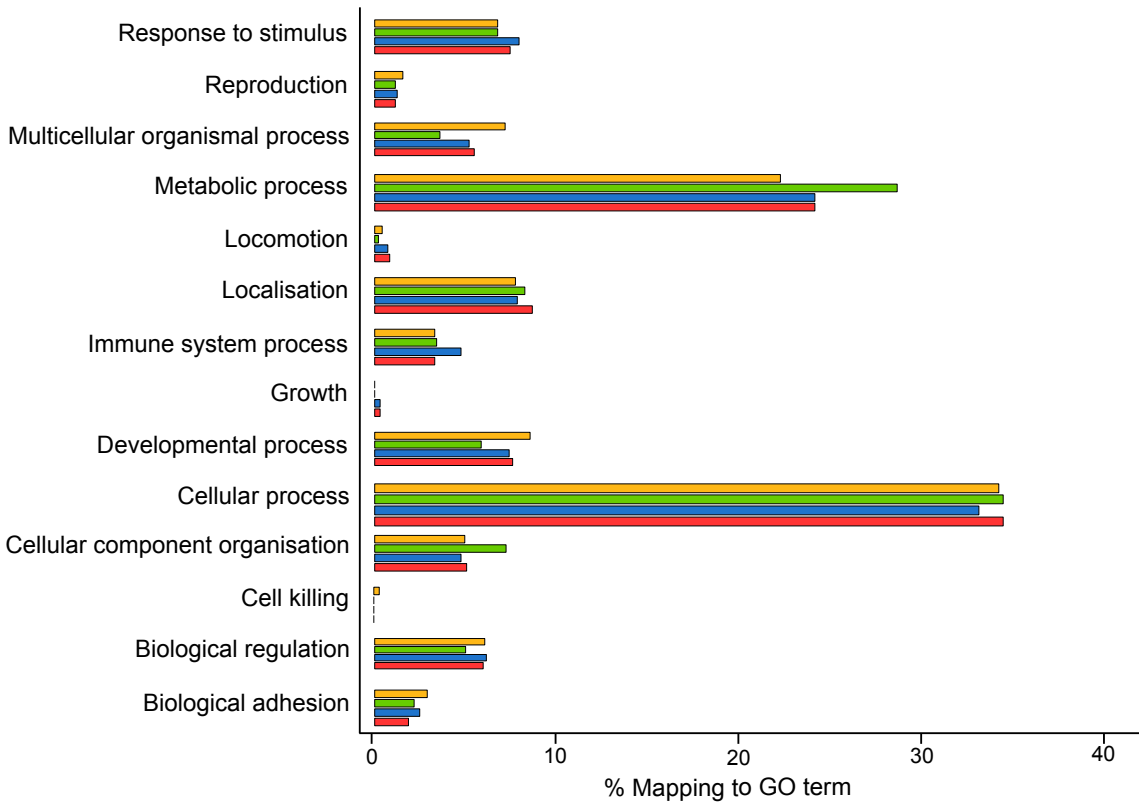

### c) Cellular Component

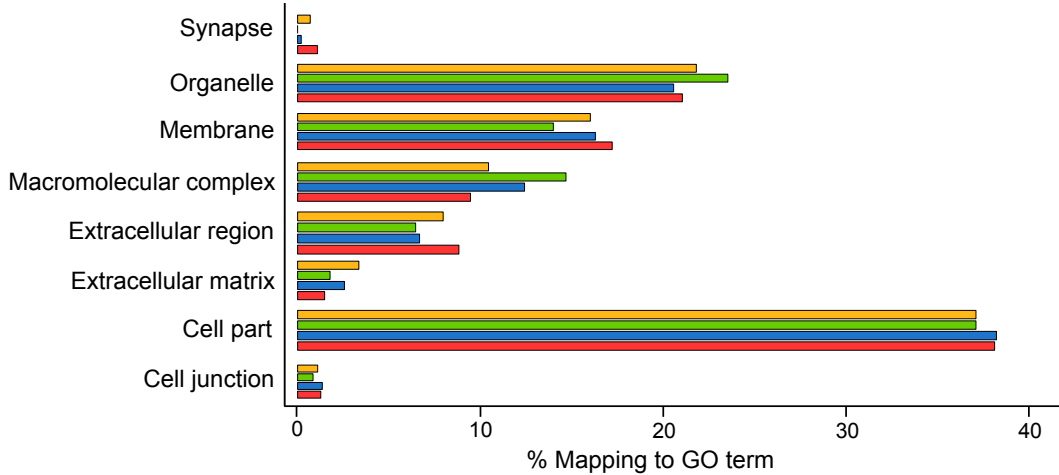

Supplement: 12864_2017_4379_MOESM7_ESM.pdf [file 12864_2017_4379_MOESM7_ESM.pdf]
