# Supplementary material for: De novo transcriptome assembly, annotation and comparison of four ecological and evolutionary model salmonid fish species
Source: Springer Nature journal article supplement (doi:10.1186/s12864-017-4379-x), 2018-01-08
Supplement: MOESM1 [file 12864_2017_4379_MOESM1_ESM.pdf]

**Table S1** Number of paired-end reads used to generate transcriptomes, and the number of transcripts in the final assemblies, with their corresponding accession numbers in the NCBI SRA and TSA databases.

| Species            | Number of clean paired-end sequencing reads | SRA database accession numbers                                                                                      | Number of transcripts in assembly | TSA database accession number |
|--------------------|---------------------------------------------|---------------------------------------------------------------------------------------------------------------------|-----------------------------------|-------------------------------|
| Atlantic salmon    | 192 M                                       | SRR6321799,<br>SRR6321800,<br>SRR6321801,<br>SRR6321802,<br>SRR6321805,<br>SRR6321806,<br>SRR6321807,<br>SRR6321808 | 36,505                            | GGAQ01000000                  |
| Brown trout        | 190 M                                       | SRR6321795,<br>SRR6321796,<br>SRR6321797,<br>SRR6321798,<br>SRR6321803,<br>SRR6321804,<br>SRR6321815,<br>SRR6321816 | 35,736                            | GGAR01000000                  |
| Arctic charr       | 180 M                                       | SRR6321809,<br>SRR6321810,<br>SRR6321811,<br>SRR6321812,<br>SRR6321813,<br>SRR6321814,<br>SRR6321825,<br>SRR6321826 | 33,126                            | GGAP01000000                  |
| European whitefish | 210 M                                       | SRR6321817,<br>SRR6321818,<br>SRR6321819,<br>SRR6321820,<br>SRR6321821,<br>SRR6321822,<br>SRR6321823,<br>SRR6321824 | 33,697                            | GGAO01000000                  |
