# Supplementary material for: De novo transcriptome assembly, annotation and comparison of four ecological and evolutionary model salmonid fish species
Source: Springer Nature journal article supplement (doi:10.1186/s12864-017-4379-x), 2018-01-08
Supplement: MOESM4 [file 12864_2017_4379_MOESM4_ESM.pdf]

**Additional file 4: Table S3** Distribution of orthologs in the current Atlantic salmon *de novo* assembly compared to the distribution of orthologs in the NCBI Atlantic salmon RefSeq protein dataset (GCF\_000233375.1). OrthoFinder results were filtered to retain only OrthoGroups with at least one RefSeq salmon protein present.

| Number of Orthologs in Orthogroup | Number of Orthogroups with given number of Orthologs in Salmon <i>de Novo</i> at Different Filtering Steps |                                               |                                          |                                                                | NCBI Atlantic salmon RefSeq Proteins |
|-----------------------------------|------------------------------------------------------------------------------------------------------------|-----------------------------------------------|------------------------------------------|----------------------------------------------------------------|--------------------------------------|
|                                   | Unfiltered                                                                                                 | After TransDecoder Single Best ORF Prediction | After CD-Hit Clustering at 100% Identity | After Trinity Full-Length Transcript Analysis (final assembly) |                                      |
| 0                                 | 9                                                                                                          | 701                                           | 756                                      | 2410                                                           | N/A                                  |
| 1                                 | 13,002                                                                                                     | 12,737                                        | 14,693                                   | 10934                                                          | 13221                                |
| 2                                 | 5,279                                                                                                      | 5,097                                         | 4,413                                    | 4595                                                           | 7312                                 |
| 3                                 | 2,143                                                                                                      | 2,044                                         | 1,331                                    | 1782                                                           | 686                                  |
| 4                                 | 868                                                                                                        | 793                                           | 440                                      | 661                                                            | 375                                  |
| 5                                 | 305                                                                                                        | 270                                           | 132                                      | 287                                                            | 99                                   |
| 6                                 | 123                                                                                                        | 119                                           | 59                                       | 119                                                            | 63                                   |
| 7                                 | 72                                                                                                         | 57                                            | 23                                       | 60                                                             | 26                                   |
| 8                                 | 31                                                                                                         | 23                                            | 8                                        | 27                                                             | 24                                   |
| 9                                 | 19                                                                                                         | 12                                            | 5                                        | 14                                                             | 8                                    |
| 10                                | 9                                                                                                          | 8                                             | 3                                        | 8                                                              | 11                                   |
| 11                                | 2                                                                                                          | 2                                             | 1                                        | 3                                                              | 7                                    |
| 12                                | 0                                                                                                          | 0                                             | 0                                        | 2                                                              | 5                                    |
| 13                                | 0                                                                                                          | 0                                             | 0                                        | 1                                                              | 4                                    |
| 14                                | 0                                                                                                          | 0                                             | 0                                        | 0                                                              | 3                                    |
| 15                                | 0                                                                                                          | 1                                             | 0                                        | 1                                                              | 0                                    |
| 16                                | 0                                                                                                          | 0                                             | 0                                        | 0                                                              | 1                                    |
| 17                                | 0                                                                                                          | 0                                             | 0                                        | 2                                                              | 0                                    |
| 18                                | 0                                                                                                          | 0                                             | 0                                        | 0                                                              | 0                                    |
| 19                                | 0                                                                                                          | 0                                             | 0                                        | 0                                                              | 2                                    |
| 20                                | 0                                                                                                          | 0                                             | 0                                        | 0                                                              | 3                                    |
| 21                                | 1                                                                                                          | 0                                             | 0                                        | 0                                                              | 1                                    |
| 22                                | 0                                                                                                          | 0                                             | 0                                        | 0                                                              | 1                                    |
| 23                                | 0                                                                                                          | 0                                             | 0                                        | 0                                                              | 0                                    |
| 24                                | 0                                                                                                          | 0                                             | 0                                        | 0                                                              | 1                                    |
| 25                                | 0                                                                                                          | 0                                             | 0                                        | 0                                                              | 0                                    |
| 26                                | 0                                                                                                          | 0                                             | 0                                        | 0                                                              | 3                                    |
| 27                                | 0                                                                                                          | 0                                             | 0                                        | 0                                                              | 1                                    |
| 28                                | 0                                                                                                          | 0                                             | 0                                        | 0                                                              | 0                                    |
| 29                                | 1                                                                                                          | 0                                             | 0                                        | 0                                                              | 1                                    |
| 30                                | 0                                                                                                          | 0                                             | 0                                        | 0                                                              | 0                                    |
