# Supplementary material for: De novo transcriptome assembly, annotation and comparison of four ecological and evolutionary model salmonid fish species
Source: Springer Nature journal article supplement (doi:10.1186/s12864-017-4379-x), 2018-01-08

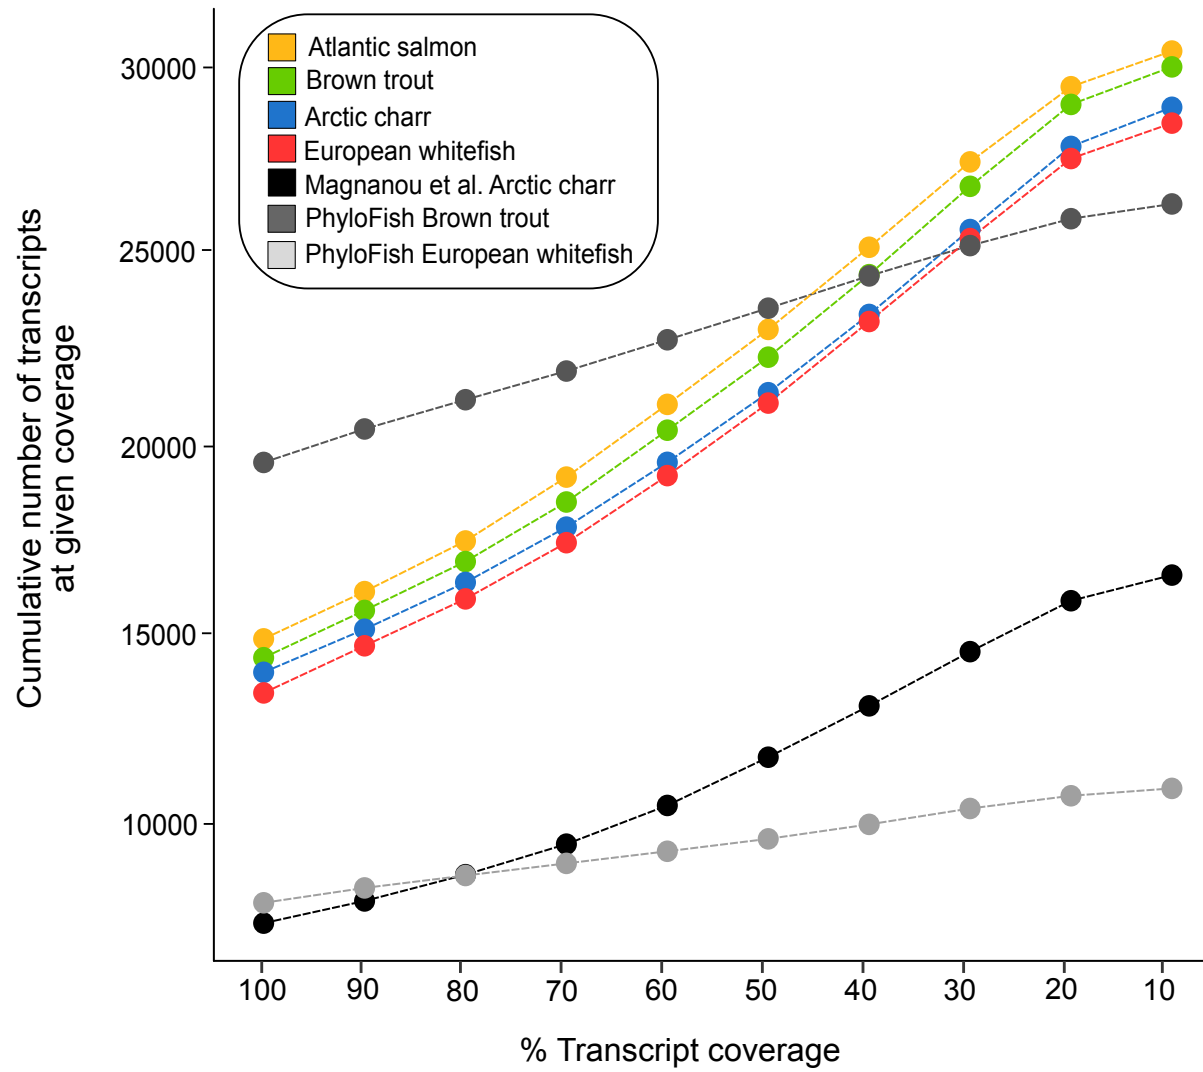

Supplement: MOESM5 [file 12864_2017_4379_MOESM5_ESM.pdf]
