# Supplementary material for: De novo transcriptome assembly, annotation and comparison of four ecological and evolutionary model salmonid fish species
Source: Springer Nature journal article supplement (doi:10.1186/s12864-017-4379-x), 2018-01-08
Supplement: MOESM6 [file 12864_2017_4379_MOESM6_ESM.pdf]

**Table S4** GO annotation (number and proportion of GO terms) assigned to the de novo transcriptomes for each of the four species.

| Species            | Molecular Function                            | # of Genes Mapped to GO Term      | % Genes Mapped to GO Term |
|--------------------|-----------------------------------------------|-----------------------------------|---------------------------|
| Atlantic salmon    | transporter activity                          | 824                               | 7.4                       |
| Atlantic salmon    | translation regulator activity                | 66                                | 0.6                       |
| Atlantic salmon    | catalytic activity                            | 4318                              | 39.0                      |
| Atlantic salmon    | channel regulator activity                    | 30                                | 0.3                       |
| Atlantic salmon    | receptor activity                             | 712                               | 6.4                       |
| Atlantic salmon    | signal transducer activity                    | 257                               | 2.3                       |
| Atlantic salmon    | antioxidant activity                          | 19                                | 0.2                       |
| Atlantic salmon    | structural molecule activity                  | 720                               | 6.5                       |
| Atlantic salmon    | binding                                       | 4135                              | 37.3                      |
| Brown trout        | transporter activity                          | 788                               | 7.2                       |
| Brown trout        | translation regulator activity                | 68                                | 0.6                       |
| Brown trout        | catalytic activity                            | 4292                              | 39.2                      |
| Brown trout        | channel regulator activity                    | 35                                | 0.3                       |
| Brown trout        | receptor activity                             | 683                               | 6.2                       |
| Brown trout        | signal transducer activity                    | 262                               | 2.4                       |
| Brown trout        | antioxidant activity                          | 24                                | 0.2                       |
| Brown trout        | structural molecule activity                  | 733                               | 6.7                       |
| Brown trout        | binding                                       | 4059                              | 37.1                      |
| Arctic charr       | transporter activity                          | 782                               | 7.4                       |
| Arctic charr       | translation regulator activity                | 64                                | 0.6                       |
| Arctic charr       | catalytic activity                            | 4199                              | 39.5                      |
| Arctic charr       | channel regulator activity                    | 30                                | 0.3                       |
| Arctic charr       | receptor activity                             | 641                               | 6.0                       |
| Arctic charr       | signal transducer activity                    | 242                               | 2.3                       |
| Arctic charr       | antioxidant activity                          | 24                                | 0.2                       |
| Arctic charr       | structural molecule activity                  | 690                               | 6.5                       |
| Arctic charr       | binding                                       | 3966                              | 37.3                      |
| European whitefish | transporter activity                          | 820                               | 7.6                       |
| European whitefish | translation regulator activity                | 61                                | 0.6                       |
| European whitefish | catalytic activity                            | 4225                              | 39.0                      |
| European whitefish | channel regulator activity                    | 30                                | 0.3                       |
| European whitefish | receptor activity                             | 709                               | 6.6                       |
| European whitefish | signal transducer activity                    | 257                               | 2.4                       |
| European whitefish | antioxidant activity                          | 22                                | 0.2                       |
| European whitefish | structural molecule activity                  | 681                               | 6.3                       |
| European whitefish | binding                                       | 4016                              | 37.1                      |
| Species            | Biological Process                            | Number of Genes Mapped to GO Term | % Genes Mapped to GO Term |
| Atlantic salmon    | cellular component organization or biogenesis | 1392                              | 6.1                       |
| Atlantic salmon    | cellular process                              | 6538                              | 28.6                      |

|                    |                                               |      |      |
|--------------------|-----------------------------------------------|------|------|
| Atlantic salmon    | localization                                  | 1700 | 7.4  |
| Atlantic salmon    | reproduction                                  | 202  | 0.9  |
| Atlantic salmon    | biological regulation                         | 1863 | 8.2  |
| Atlantic salmon    | response to stimulus                          | 1923 | 8.4  |
| Atlantic salmon    | developmental process                         | 1698 | 7.4  |
| Atlantic salmon    | multicellular organismal process              | 1246 | 5.5  |
| Atlantic salmon    | locomotion                                    | 123  | 0.5  |
| Atlantic salmon    | biological adhesion                           | 375  | 1.6  |
| Atlantic salmon    | metabolic process                             | 5345 | 23.4 |
| Atlantic salmon    | growth                                        | 17   | 0.1  |
| Atlantic salmon    | immune system process                         | 420  | 1.8  |
| Atlantic salmon    | cell killing                                  | 6    | 0.0  |
| Brown trout        | cellular component organization or biogenesis | 1393 | 6.2  |
| Brown trout        | cellular process                              | 6433 | 28.7 |
| Brown trout        | localization                                  | 1653 | 7.4  |
| Brown trout        | reproduction                                  | 208  | 0.9  |
| Brown trout        | biological regulation                         | 1810 | 8.1  |
| Brown trout        | response to stimulus                          | 1875 | 8.4  |
| Brown trout        | developmental process                         | 1599 | 7.1  |
| Brown trout        | multicellular organismal process              | 1196 | 5.3  |
| Brown trout        | locomotion                                    | 111  | 0.5  |
| Brown trout        | biological adhesion                           | 364  | 1.6  |
| Brown trout        | metabolic process                             | 5347 | 23.8 |
| Brown trout        | growth                                        | 19   | 0.1  |
| Brown trout        | immune system process                         | 423  | 1.9  |
| Brown trout        | cell killing                                  | 6    | 0.0  |
| Arctic charr       | cellular component organization or biogenesis | 1335 | 6.1  |
| Arctic charr       | cellular process                              | 6258 | 28.6 |
| Arctic charr       | localization                                  | 1612 | 7.4  |
| Arctic charr       | reproduction                                  | 206  | 0.9  |
| Arctic charr       | biological regulation                         | 1765 | 8.1  |
| Arctic charr       | response to stimulus                          | 1816 | 8.3  |
| Arctic charr       | developmental process                         | 1573 | 7.2  |
| Arctic charr       | multicellular organismal process              | 1188 | 5.4  |
| Arctic charr       | locomotion                                    | 110  | 0.5  |
| Arctic charr       | biological adhesion                           | 358  | 1.6  |
| Arctic charr       | metabolic process                             | 5202 | 23.8 |
| Arctic charr       | growth                                        | 14   | 0.1  |
| Arctic charr       | immune system process                         | 427  | 2.0  |
| Arctic charr       | cell killing                                  | 8    | 0.0  |
| European whitefish | cellular component organization or biogenesis | 1386 | 6.2  |
| European whitefish | cellular process                              | 6385 | 28.7 |
| European whitefish | localization                                  | 1668 | 7.5  |
| European whitefish | reproduction                                  | 197  | 0.9  |
| European whitefish | biological regulation                         | 1834 | 8.2  |
| European whitefish | response to stimulus                          | 1836 | 8.2  |

| European whitefish | developmental process            | 1616                              | 7.3                       |
|--------------------|----------------------------------|-----------------------------------|---------------------------|
| European whitefish | multicellular organismal process | 1216                              | 5.5                       |
| European whitefish | locomotion                       | 126                               | 0.6                       |
| European whitefish | biological adhesion              | 358                               | 1.6                       |
| European whitefish | metabolic process                | 5224                              | 23.4                      |
| European whitefish | growth                           | 13                                | 0.1                       |
| European whitefish | immune system process            | 411                               | 1.8                       |
| European whitefish | cell killing                     | 4                                 | 0.0                       |
| Species            | Cellular Component               | Number of Genes Mapped to GO Term | % Genes Mapped to GO Term |
| Atlantic salmon    | synapse                          | 60                                | 0.6                       |
| Atlantic salmon    | cell junction                    | 88                                | 0.9                       |
| Atlantic salmon    | membrane                         | 959                               | 9.7                       |
| Atlantic salmon    | macromolecular complex           | 1276                              | 12.9                      |
| Atlantic salmon    | extracellular matrix             | 156                               | 1.6                       |
| Atlantic salmon    | cell part                        | 4513                              | 45.7                      |
| Atlantic salmon    | organelle                        | 2376                              | 24.1                      |
| Atlantic salmon    | extracellular region             | 449                               | 4.5                       |
| Brown trout        | synapse                          | 54                                | 0.5                       |
| Brown trout        | cell junction                    | 84                                | 0.8                       |
| Brown trout        | membrane                         | 944                               | 9.5                       |
| Brown trout        | macromolecular complex           | 1324                              | 13.4                      |
| Brown trout        | extracellular matrix             | 149                               | 1.5                       |
| Brown trout        | cell part                        | 4517                              | 45.6                      |
| Brown trout        | organelle                        | 2399                              | 24.2                      |
| Brown trout        | extracellular region             | 430                               | 4.3                       |
| Arctic charr       | synapse                          | 51                                | 0.5                       |
| Arctic charr       | cell junction                    | 89                                | 0.9                       |
| Arctic charr       | membrane                         | 891                               | 9.4                       |
| Arctic charr       | macromolecular complex           | 1262                              | 13.3                      |
| Arctic charr       | extracellular matrix             | 146                               | 1.5                       |
| Arctic charr       | cell part                        | 4337                              | 45.8                      |
| Arctic charr       | organelle                        | 2267                              | 24.0                      |
| Arctic charr       | extracellular region             | 418                               | 4.4                       |
| European whitefish | synapse                          | 67                                | 0.7                       |
| European whitefish | cell junction                    | 79                                | 0.8                       |
| European whitefish | membrane                         | 928                               | 9.6                       |
| European whitefish | macromolecular complex           | 1295                              | 13.4                      |
| European whitefish | extracellular matrix             | 156                               | 1.6                       |
| European whitefish | cell part                        | 4403                              | 45.5                      |
| European whitefish | organelle                        | 2309                              | 23.9                      |
| European whitefish | extracellular region             | 441                               | 4.6                       |
